# Supplementary figures and images for: Parallel Retention of Pdx2 Genes in Cartilaginous Fish and Coelacanths
Source: PubMed Central journal article supplement — Mol Biol Evol. 2010 May 12;27(10):2386–91. doi: 10.1093/molbev/msq121 (PMC2944030; doi:10.1093/molbev/msq121), 2010-05-12

Supplementary figure 1:

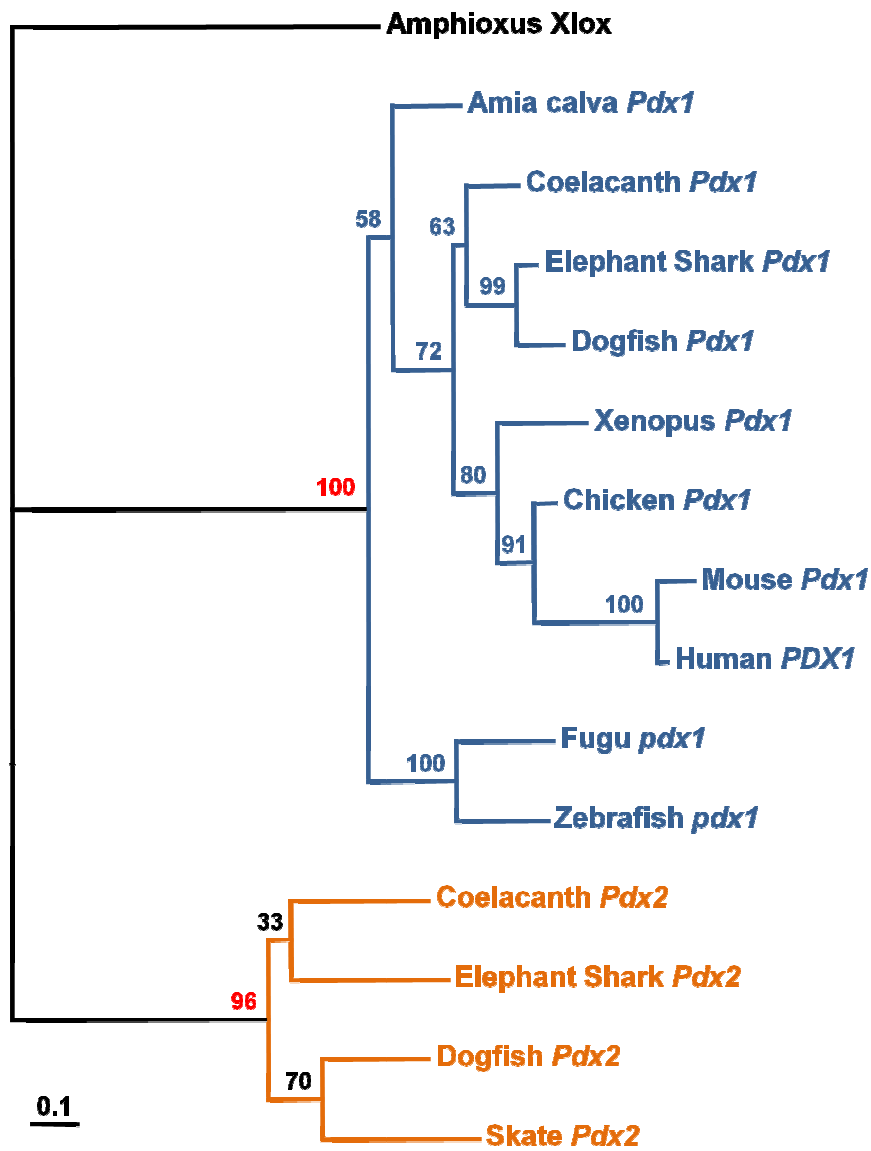

Supplementary figure 2:

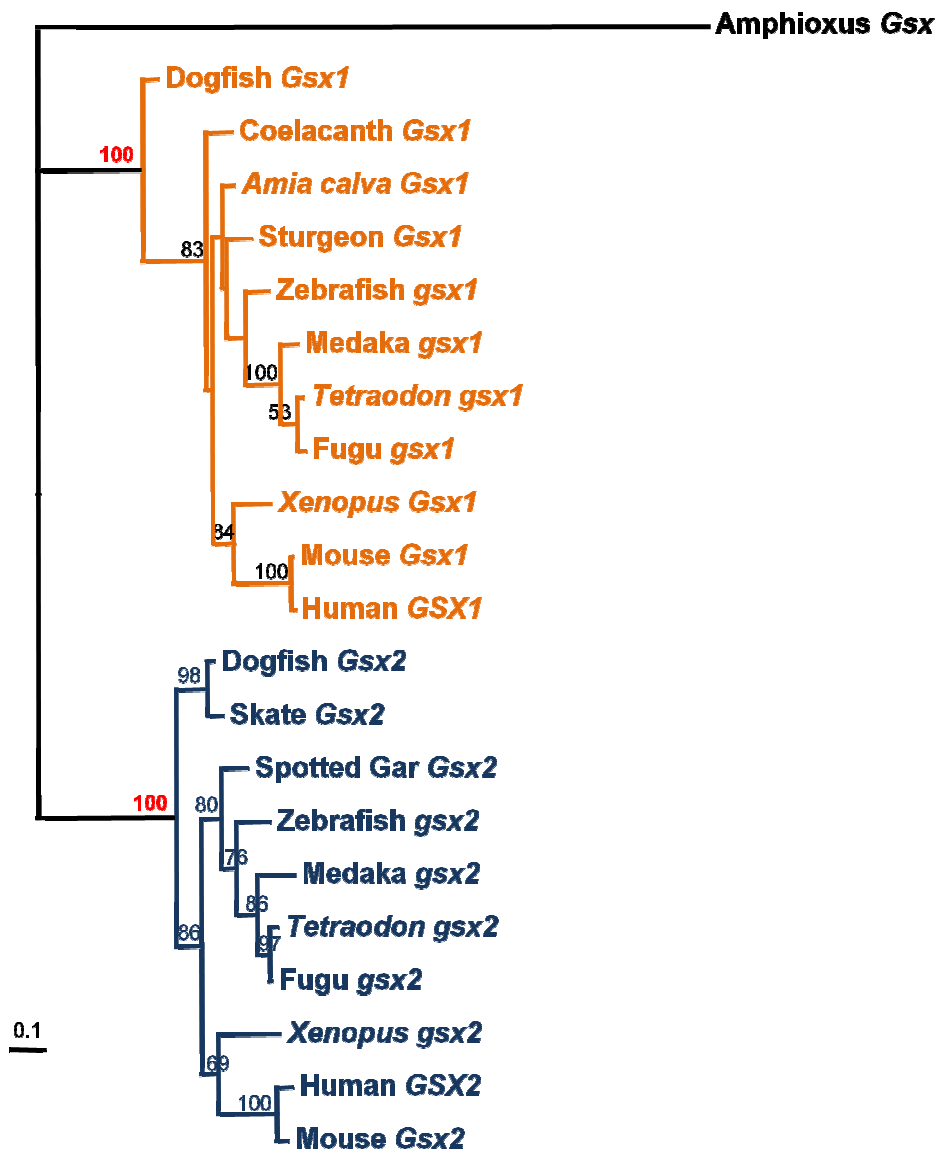

Supplementary figure 3:

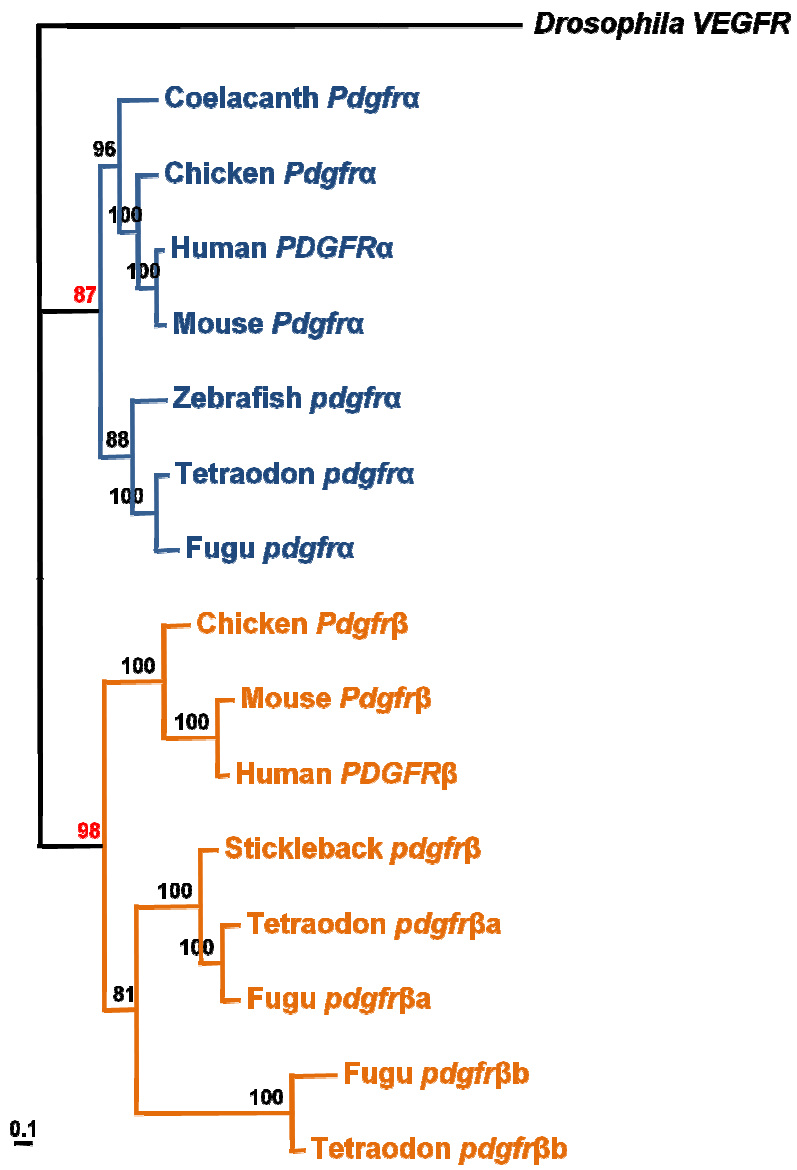

Supplement: supp_msq121_mbe-10-0074-File007.pdf [file supp_msq121_mbe-10-0074-File007.pdf]
